# Supplementary material for: Investigation of the Environmental and Socio-Economic Characteristics of Counties with a High Asthma Burden to Focus Asthma Action in Utah
Source: MDPI journal article supplement (doi:10.3390/ijerph17145251), 2020-07-21

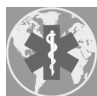

*Supplementary Materials*

# Investigation of the Environmental and Socio-Economic Characteristics of Counties with a High Asthma Burden to Focus Asthma Action in Utah

Maureen Vowles <sup>1</sup>, Ruth Kerry <sup>2</sup>, Ben Ingram <sup>3</sup> and Linda Mason <sup>4</sup>

<sup>1</sup> Department of Public Health and Policy, University of Liverpool, Liverpool, L69 3GB, UK; mmvowles@gmail.com

<sup>2</sup> Department of Geography, Brigham Young University, Utah, 84602, USA; ruth\_kerry@byu.edu

<sup>3</sup> Faculty of Engineering, Universidad de Talca, Curicó, 3460000, Chile; ingrambr@gmail.com

<sup>4</sup> Liverpool School of Tropical Medicine, Liverpool, L3 5QA, UK; Linda.Mason@lstm.ac.uk

\* Correspondence: mmvowles@gmail.com

## 1. Abbreviation Guide

|                      |                                                                               |
|----------------------|-------------------------------------------------------------------------------|
| AAP                  | Adult Asthma Prevalence                                                       |
| AER                  | Asthma Emergency Room                                                         |
| AI                   | Aridity Index                                                                 |
| BRFSS                | US Behavioral Risk Factor Surveillance System                                 |
| CAA                  | Clean Air Act                                                                 |
| CDC                  | Centers for Disease Control and Prevention                                    |
| CL PM <sub>2.5</sub> | County Level Particulate Matter with Diameter less than 2.5 micrometers       |
| CT PM <sub>2.5</sub> | Census Tract Level Particulate Matter with diameter less than 2.5 micrometers |
| DEM                  | Digital Elevation Model                                                       |
| EPA                  | Environmental Protection Agency                                               |
| EPHT                 | Environmental Public Health Tracking Network                                  |
| ER                   | Emergency Room                                                                |
| HII                  | Health Improvement Index                                                      |
| HH                   | High value surrounded by high values                                          |
| HP-2020              | Health People 2020                                                            |
| HL                   | High value surrounded by low values                                           |
| KSL                  | K Salt Lake Radio/TV network                                                  |
| LH                   | Low value surrounded by high values                                           |
| LL                   | Low value surrounded by low values                                            |
| LMI                  | Local Moran's I                                                               |
| MAE                  | Mean Annual Potential Evapotranspiration                                      |
| MAP                  | Mean Annual Precipitation                                                     |
| MHHI                 | Median Household Income                                                       |
| MLR                  | Multiple Linear Regression                                                    |
| NAAQS                | National Ambient Air Quality Standards                                        |
| NHIS                 | National Health Interview Survey                                              |
| PM <sub>2.5</sub>    | Particulate Matter with diameter less than 2.5 micrometers)                   |
| PM <sub>10</sub>     | Particulate Matter with diameter less than 10 micrometers)                    |
| RK                   | Regression Kriging                                                            |
| RMSE                 | Root Mean Square Error                                                        |
| SAHIE                | Small Area Health Insurance Estimates                                         |
| SDH                  | Social Determinants of Health                                                 |
| SRTM                 | Shuttle Radar Topography Model                                                |
| USAD                 | Utah Small Area Data                                                          |

|      |                                 |
|------|---------------------------------|
| USGS | United States Geological Survey |
| UT   | Utah                            |
| WHO  | World Health Organization       |

## 2. Methods

### 2.1. Questions used from BRFSS to determine AAP, smoking and obesity

AAP, smoking and obesity rates were determined from the BRFSS using the following questions:

1) "Have you ever been told by a doctor {nurse or other health professional} that you have asthma?" Current asthma is defined as an affirmative response to that question followed by an affirmative response to the subsequent question "Do you still have asthma?" [65] and 2) "Do you now smoke cigarettes every day, some days, or not at all?" [66], with individuals reporting any smoking being considered as smokers. Obesity was determined from BRFSS questions about height and weight and calculated based on a BMI of 30-99.8 [66].

### 2.2. CL PM2.5 Data limitations

The following statement of data limitations comes with the CL PM2.5 data: "measures estimate average annual concentration of fine PM pollution in the county, and can miss "important short-term fluctuations in air quality (such as stagnation events), local patterns (high concentrations near roads and other major sources), and other pollutants (such as ozone, etc.). Further, these estimates are based on seasonal averages. Even within counties with low average fine PM concentrations, locations can experience days of dangerously elevated levels. It should be noted that these data are derived from only one air quality model among several. Like all models, this air quality model has errors. There is also a large time lag (up to 5 years) between when these data are collected and when the modeled results become available."

<https://www.countyhealthrankings.org/app/UT/2019/measure/factors/125/description>

### 2.3. Socio-economic indicators used in HII calculation

1) adults (over 25) with <9 years education, 2) Adults (over 25) with at least a high school diploma, 3) median family income, 4) income disparity, 5) owner occupied houses, 6) unemployment, 7) families below poverty level, 8) population below 150% of poverty threshold and 9) single parent households with children.

### 3. Results

#### 3.1. Classification of Utah Counties as Metro (M) and Non-metro (N)

|            |   |
|------------|---|
| Beaver     | N |
| Box Elder  | M |
| Cache      | M |
| Carbon     | M |
| Daggett    | N |
| Davis      | M |
| Duchesne   | N |
| Emery      | N |
| Garfield   | N |
| Grand      | N |
| Iron       | M |
| Juab       | M |
| Kane       | N |
| Millard    | N |
| Morgan     | M |
| Piute      | N |
| Rich       | N |
| Salt Lake  | M |
| San Juan   | N |
| Sanpete    | N |
| Sevier     | N |
| Summit     | M |
| Tooele     | M |
| Uintah     | M |
| Utah       | M |
| Wasatch    | M |
| Washington | M |
| Wayne      | N |
| Weber      | M |

(M = Metropolitan/Micropolitan counties; N = Non-metropolitan counties. Source: USDA (2013))

United States Department of Agriculture USDA (2013) 'What is rural?' [Online] Available from: <https://www.ers.usda.gov/topics/rural-economy-population/rural-classifications/what-is-rural.aspx> [Accessed: 3 March 2017]

Table 1. Correlation matrix to Pearson coefficients for all counties

|                            | Population Density | Native American Population | Estimated Mine Area | Median AI | Min. AI | AER    | AAP    | PM2.5   | Red Air Days | Elevation | Uninsured | Smoking | Wind Erosion Risk | Poverty | MHHI   | Obesity | Unemploy ment | Total Mines | HII |  |
|----------------------------|--------------------|----------------------------|---------------------|-----------|---------|--------|--------|---------|--------------|-----------|-----------|---------|-------------------|---------|--------|---------|---------------|-------------|-----|--|
| Population Density         | 1                  |                            |                     |           |         |        |        |         |              |           |           |         |                   |         |        |         |               |             |     |  |
| Native American Population | -0.098             | 1                          |                     |           |         |        |        |         |              |           |           |         |                   |         |        |         |               |             |     |  |
| Estimated Mine Area        | -0.169             | 0.312                      | 1                   |           |         |        |        |         |              |           |           |         |                   |         |        |         |               |             |     |  |
| Median AI                  | 0.264              | -0.232                     | -0.353**            | 1         |         |        |        |         |              |           |           |         |                   |         |        |         |               |             |     |  |
| Min. AI                    | .455*              | -0.291                     | -.469*              | .894**    | 1       |        |        |         |              |           |           |         |                   |         |        |         |               |             |     |  |
| AER                        | -0.136             | 0.287                      | 0.250               | -.381*    | -.378*  | 1      |        |         |              |           |           |         |                   |         |        |         |               |             |     |  |
| AAP                        | 0.010              | 0.071                      | .450*               | -.479**   | -0.350  | 0.045  | 1      |         |              |           |           |         |                   |         |        |         |               |             |     |  |
| PM2.5                      | 0.276              | -.410*                     | -0.238              | 0.319     | .433*   | -0.327 | -0.057 | 1       |              |           |           |         |                   |         |        |         |               |             |     |  |
| Red Air Days               | .748**             | -0.188                     | -0.269              | .631**    | .753**  | -0.307 | -0.237 | .412*   | 1            |           |           |         |                   |         |        |         |               |             |     |  |
| Elevation                  | -.384*             | -0.109                     | -0.270              | .501**    | 0.241   | -0.231 | -0.298 | -0.065  | -0.243       | 1         |           |         |                   |         |        |         |               |             |     |  |
| Uninsured                  | -0.252             | .452*                      | 0.142               | -0.358    | -.464*  | .374*  | 0.086  | -.478** | -.486**      | 0.055     | 1         |         |                   |         |        |         |               |             |     |  |
| Smoking                    | -0.132             | .683**                     | .434*               | -.401*    | -.422*  | 0.017  | .418*  | -0.340  | -0.324       | -0.133    | .439*     | 1       |                   |         |        |         |               |             |     |  |
| Wind Erosion Risk          | -0.165             | 0.314                      | .999**              | -.524**   | -.456*  | 0.509  | .453*  | -0.214  | -0.261       | -0.266    | .439*     | .439*   | 1                 |         |        |         |               |             |     |  |
| Poverty                    | -0.189             | .760**                     | .395*               | -.387*    | -.418*  | 0.153  | 0.354  | -.472** | -.388*       | -0.051    | .756**    | .398*   | .439*             | 1       |        |         |               |             |     |  |
| MHHI                       | 0.309              | -0.258                     | -0.258              | .602**    | .610**  | -0.170 | -0.302 | .508**  | .631**       | 0.002     | -.490**   | -.685** | -0.251            | -.490** | 1      |         |               |             |     |  |
| Obesity                    | -0.111             | 0.180                      | 0.266               | -.564**   | -.416*  | -0.114 | .370*  | 0.103   | -0.330       | -0.353    | .383*     | -.325   | 0.218             | .383*   | -.325  | 1       |               |             |     |  |
| Unemploy ment              | -0.195             | .608**                     | 0.295               | -.425*    | -.550** | 0.145  | 0.139  | -.586** | -0.089       | -.423*    | .640**    | -.451*  | 0.103             | .640**  | -.451* | 0.103   | 1             |             |     |  |
| Total Mines                | -0.128             | .832**                     | .649*               | -.382*    | -.422*  | 0.252  | 0.329  | -.460*  | -0.142       | 0.313     | .728**    | .690**  | 0.234             | .728**  | .690** | 0.234   | .690**        | 1           |     |  |
| HII                        | -0.016             | .389*                      | .498**              | -.525**   | -.433*  | 0.130  | .492** | -.369*  | -0.306       | -0.460*   | .583**    | .493**  | -.651*            | .583**  | -.651* | -.658** | .396*         | .470*       | 1   |  |

\*Correlation is significant at  $p=0.05$  \*\*Correlation is significant at  $p=0.01$  level

Table 2 Pearson Correlation Matrix for Metro Counties

|                     |        |        |         |         |        |        |        |        |        |        |        |        |          |         |       |       |       |   |  |  |  |
|---------------------|--------|--------|---------|---------|--------|--------|--------|--------|--------|--------|--------|--------|----------|---------|-------|-------|-------|---|--|--|--|
| Pop density         | 1      |        |         |         |        |        |        |        |        |        |        |        |          |         |       |       |       |   |  |  |  |
| Native American     | -0.145 | 1      |         |         |        |        |        |        |        |        |        |        |          |         |       |       |       |   |  |  |  |
| Estimated Mine Area | -0.229 | 0.284  | 1       |         |        |        |        |        |        |        |        |        |          |         |       |       |       |   |  |  |  |
| Median AI           | 0.126  | -0.317 | -0.588* | 1       |        |        |        |        |        |        |        |        |          |         |       |       |       |   |  |  |  |
| Min.AI              | 0.378  | -0.276 | -.536*  | .876**  | 1      |        |        |        |        |        |        |        |          |         |       |       |       |   |  |  |  |
| AER                 | -0.102 | .542*  | -0.082  | -0.182  | -0.269 | 1      |        |        |        |        |        |        |          |         |       |       |       |   |  |  |  |
| AAP                 | 0.056  | 0.076  | .561*   | -.558*  | -0.425 | -0.338 | 1      |        |        |        |        |        |          |         |       |       |       |   |  |  |  |
| PM2.5               | 0.288  | 0.127  | 0.304   | -0.173  | -0.073 | -0.282 | 0.250  | 1      |        |        |        |        |          |         |       |       |       |   |  |  |  |
| Red Air Days        | .735** | -0.347 | -0.380  | .517*   | .670** | -0.304 | -0.271 | 0.238  | 1      |        |        |        |          |         |       |       |       |   |  |  |  |
| Elevation           | -0.404 | -0.014 | -0.134  | .674**  | 0.387  | -0.091 | -0.363 | -0.236 | -0.156 | 1      |        |        |          |         |       |       |       |   |  |  |  |
| Uninsured           | -0.131 | 0.311  | -0.009  | -0.124  | -0.268 | 0.408  | -0.144 | -0.408 | -0.343 | 0.101  | 1      |        |          |         |       |       |       |   |  |  |  |
| Smoking             | -0.036 | 0.208  | 0.387   | -0.384  | -0.334 | -0.310 | .672** | 0.116  | -0.242 | 0.136  | 0.136  | 1      |          |         |       |       |       |   |  |  |  |
| Poverty             | -0.140 | 0.082  | 0.368   | -0.377  | -0.341 | -0.220 | 0.434  | -0.399 | -0.396 | 0.399  | 0.474  | 0.474  | 1        |         |       |       |       |   |  |  |  |
| MHHH                | 0.138  | -0.061 | -0.425  | .522*   | 0.475  | 0.088  | -0.444 | 0.408  | 0.422  | -.549* | -0.443 | -0.443 | -0.899** | 1       |       |       |       |   |  |  |  |
| Obesity             | -0.024 | 0.315  | 0.482   | -.724** | -0.499 | -0.109 | .533*  | 0.391  | -0.226 | 0.089  | .551*  | .551*  | 0.235    | -0.438  | 1     |       |       |   |  |  |  |
| Unemployment        | -0.124 | -0.262 | 0.152   | -0.253  | -0.398 | -0.437 | .531*  | 0.348  | -0.192 | -0.129 | -.006  | -.006  | -0.059   | 0.359   | 0.359 | 1     |       |   |  |  |  |
| Total Mines         | -0.158 | 0.011  | .821**  | -0.433  | -0.486 | -0.368 | .695** | 0.227  | -0.383 | -0.081 | .527*  | .527*  | 0.495    | 0.289   | 0.289 | 0.488 | 1     |   |  |  |  |
| HII                 | 0.139  | 0.005  | .573*   | -0.488  | -0.295 | -0.174 | .562*  | 0.042  | -0.222 | 0.377  | 0.484  | 0.484  | .618*    | -.773** | .614* | 0.105 | 0.105 | 1 |  |  |  |

\*Correlation is significant at p=0.05 \*\*Correlation is significant at p=0.01 level

Table 3. Pearson Correlation Matrix for Non-Metro Counties

|                     | Pop. Density | Native American Population | Estimated Mine Area | Median AI | min.AI | APER    | AAP    | PM2.5  | red air days | Elevation | Uninsured | smoking | Poverty | MHHH    | Obesity | Unemployment | Total Mines | HII    |
|---------------------|--------------|----------------------------|---------------------|-----------|--------|---------|--------|--------|--------------|-----------|-----------|---------|---------|---------|---------|--------------|-------------|--------|
| Pop density         | 1            | -0.123                     | -.552*              | .593*     | 0.332  | -0.446  | 0.042  | 0.372  | 0.091        | 0.396     | 0.075     | -0.012  | 0.032   | -0.028  | 0.054   | -0.101       | -0.263      | -0.005 |
| Native American     |              | 1                          | 0.380               | -0.246    | -0.386 | 0.283   | 0.071  | -0.407 | -0.096       | -0.303    | .550*     | .923**  | .921**  | -0.315  | 0.163   | .635*        | .873**      | 0.531  |
| Estimated Mine Area |              |                            | 1                   | -.688**   | -.588* | .535*   | 0.335  | -0.492 | -0.320       | -0.531    | 0.265     | 0.485   | 0.422   | -0.095  | -0.019  | 0.383        | .689**      | 0.442  |
| Median AI           |              |                            |                     | 1         | .795** | -.715** | -0.423 | 0.450  | 0.329        | .861**    | -0.256    | -0.181  | -0.215  | 0.123   | 0.106   | -0.460       | -0.478      | -0.421 |
| min.AI              |              |                            |                     |           | 1      | -0.510  | -0.252 | .633*  | .585*        | .603*     | -0.311    | -0.335  | -0.338  | 0.201   | 0.130   | -.682**      | -0.529      | -0.452 |
| APER                |              |                            |                     |           |        | 1       | 0.454  | -0.292 | -0.262       | -.595*    | 0.244     | 0.218   | 0.324   | -0.352  | -0.277  | 0.236        | 0.437       | 0.359  |
| AAP                 |              |                            |                     |           |        |         | 1      | -0.171 | -0.272       | -0.269    | 0.297     | 0.110   | 0.292   | -0.082  | 0.072   | -0.018       | 0.255       | 0.397  |
| PM2.5               |              |                            |                     |           |        |         |        | 1      | 0.346        | 0.280     | -0.139    | -0.414  | -0.376  | 0.321   | 0.276   | -.595*       | -0.509      | -0.464 |
| red air days        |              |                            |                     |           |        |         |        |        | 1            | -0.074    | -0.342    | -0.053  | -0.127  | 0.362   | -0.205  | -0.312       | -0.259      | 0.084  |
| Elevation           |              |                            |                     |           |        |         |        |        |              | 1         | -0.342    | -0.231  | -0.269  | 0.038   | -0.205  | -0.368       | -0.417      | -.591* |
| Uninsured           |              |                            |                     |           |        |         |        |        |              |           | 1         | .573*   | .739**  | -.716** | -0.257  | 0.431        | 0.387       | .760** |
| smoking             |              |                            |                     |           |        |         |        |        |              |           |           | 1       | .930**  | -0.362  | 0.007   | .700**       | .889**      | .608*  |
| Poverty             |              |                            |                     |           |        |         |        |        |              |           |           |         | 1       | -0.488  | 0.063   | .592*        | .831**      | .661*  |
| MHHH                |              |                            |                     |           |        |         |        |        |              |           |           |         |         | 1       | 0.409   | -0.471       | -0.246      | -0.367 |
| Obesity             |              |                            |                     |           |        |         |        |        |              |           |           |         |         |         | 1       | -0.216       | 0.206       | -0.360 |
| Unemployment        |              |                            |                     |           |        |         |        |        |              |           |           |         |         |         |         | 1            | .694**      | 0.440  |
| Total Mines         |              |                            |                     |           |        |         |        |        |              |           |           |         |         |         |         |              | 1           | 0.505  |
| HII                 |              |                            |                     |           |        |         |        |        |              |           |           |         |         |         |         |              |             | 1      |

\*Correlation is significant at p=0.05 \*\*Correlation is significant at p=0.01 level

### 3.2. Investigating USAD and census tract data through regression kriging

As data at the USAD level ( $n=99$ ) and census tract level ( $n=588$ ) were available for the HII [55] (Figure 5b) and CT PM<sub>2.5</sub>, respectively, it was decided to investigate whether these data could be used to gain further insight into AAP and AER patterns. The HII and CT PM<sub>2.5</sub> data were aggregated to the county-level by averaging the values for the five nearest neighbor USAD/census tracts (Figure 5a-b not shown for CT PM<sub>2.5</sub>) to allow correlation analysis with AAP and AER data at the county-level. The correlations between HII and AAP and AER visits at the county-level were 0.49 and 0.13, respectively. Given the stronger correlation with AAP than AER visits, the HII data were used to regression kriging the AAP data to the USAD level ( $n=99$ ). The AER visit data correlated better with the CT PM<sub>2.5</sub> data (Summer 2011 max.  $r=0.323$  and Winter 2011-2014 mean  $r=-0.347$ ) so the modelled PM<sub>2.5</sub> data were used to regression kriging AER visits. The county-level AAP was used as the dependent variable in regression with the county-level HII data as a single independent variable, then a variogram of the regression residuals was computed and modelled. The regression residuals were ordinary kriged to the USAD level. The regression equation from the county-level was then used to predict AAP ( $AAP = 0.040558\alpha + 4.884658$  where  $\alpha$  corresponds to HII county-level data) at the USAD level and the kriged residuals were added to these regressed values (Figure 2c). To determine the success of the regression kriging, the RK values were aggregated to the county-level using averaging of the five nearest neighbor values (Figure 2d). These values were then correlated and compared with the original county-level AAP values. The correlation coefficient was  $r=0.93$  and the mean RMSE (Figure 2e) was 0.35%. This and the result that follows for AER visits suggests that the combination of using regression association and spatial association in regression kriging is successful at predicting AAP and AER visits at the USAD level and census tract level. The same procedure was followed with the AER data and the CT PM<sub>2.5</sub> data. The regression equation used was  $AER=0.3965\beta_0 - 1.4886\beta_1 + 27.915$  where  $\beta_0$  and  $\beta_1$  correspond to Summer2011Max and Winter2011to2014Mean, respectively. Once the RK AER data (Figure 2f) were aggregated to the county-level (Figure 2g), the correlation with the original county-level AER data was  $r=0.876$  and the mean RMSE (Figure 2h) was 2.197.

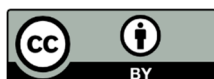

Supplement: s1 [file s1]
